# Supplementary material for: Spatial changes in community composition and food web structure of mesozooplankton across the Adriatic basin (Mediterranean Sea)
Source: Copernicus journal article supplement (doi:10.5194/bg-19-1833-2022), 2022-04-01
Supplement: Supplementary file 1 [file bg-19-1833-2022-supplement.pdf]

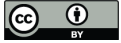

*Supplement of*

## **Spatial changes in community composition and food web structure of mesozooplankton across the Adriatic basin (Mediterranean Sea)**

**Emanuela Fanelli et al.**

*Correspondence to:* Emanuela Fanelli (e.fanelli@univpm.it)

The copyright of individual parts of the supplement might differ from the article licence.

## Supplementary material

**Table S1.** List and abundance (N/m<sup>2</sup>) of the taxa collected in the different hauls from the three sub-areas of the Adriatic basin surveyed in June-July 2019 during MEDIAS 2019 survey.

| Sub-basin                     | Northern Adriatic |          |          |          |           |          |          |         | Central Adriatic |          |          |          | Southern Adriatic |          |          |          |
|-------------------------------|-------------------|----------|----------|----------|-----------|----------|----------|---------|------------------|----------|----------|----------|-------------------|----------|----------|----------|
| Taxon                         | 4                 | 14       | 17       | 22       | 23        | 30       | 33       | 38      | 43               | 48C      | 54       | 64       | 5                 | 11       | 48S      | 57       |
| <i>Phylum</i> CNIDARIA        |                   |          |          |          |           |          |          |         |                  |          |          |          |                   |          |          |          |
| <i>Class</i> HYDROZOA         |                   |          |          |          |           |          |          |         |                  |          |          |          |                   |          |          |          |
| <i>Order</i> SIPHONOPHORAE    |                   |          |          |          |           |          |          |         |                  |          |          |          |                   |          |          |          |
| <i>Suborder</i> CALYCOPHORAE  | -                 | -        | -        | -        | 282.35    | 1623.53  | 360.78   | -       | -                | -        | 7.84     | 462.75   | 175.54            | -        | 690.20   | 7.84     |
| <i>Phylum</i> ARTHROPODA      |                   |          |          |          |           |          |          |         |                  |          |          |          |                   |          |          |          |
| <i>Subphylum</i> CRUSTACEA    |                   |          |          |          |           |          |          |         |                  |          |          |          |                   |          |          |          |
| <i>Superorder</i> CLADOCERA   |                   |          |          |          |           |          |          |         |                  |          |          |          |                   |          |          |          |
| <i>Evadne spinifera</i>       | 384.81            | 819.51   | 777.35   | -        | 2766.80   | 9544.84  | -        | -       | -                | 798.90   | 101.34   | -        | -                 | -        | -        | -        |
| <i>Penilia avirostris</i>     | -                 | 204.88   | 518.24   | -        | 922.27    | 3123.77  | 2569.08  | 4290.38 | -                | 1681.90  | -        | 173.41   | 446.35            | 1389.46  | 351.67   | -        |
| <i>Podon sp.</i>              | 962.03            | 2356.08  | 6477.95  | 1397.06  | 6455.87   | 2256.05  | 3050.78  | 5203.22 | 1577.78          | 672.76   | -        | 173.41   | 267.81            | 1805.16  | 1406.68  | -        |
| <i>Pseudevadne tergestina</i> | -                 | -        | -        | -        | 7839.27   | -        | -        | -       | -                | 210.24   | -        | -        | -                 | -        | 70.33    | -        |
| <i>Subclass</i> COPEPODA      |                   |          |          |          |           |          |          |         |                  |          |          |          |                   |          |          |          |
| <i>Order</i> CALANOIDA        |                   |          |          |          |           |          |          |         |                  |          |          |          |                   |          |          |          |
| <i>Acartia sp.</i>            | 29245.64          | 31243.68 | 99171.34 | -        | 221000.72 | 14056.94 | 8831.21  | 185.40  | 1150.51          | 10175.47 | 506.68   | 2427.71  | -                 | 31.37    | 70.33    | 69.72    |
| <i>Aetideidae</i>             | -                 | -        | -        | -        | -         | -        | -        | -       | -                | -        | -        | -        | -                 | 23.53    | -        | -        |
| <i>Aetideus giesbrechti</i>   | -                 | -        | -        | -        | -         | -        | -        | -       | -                | -        | -        | -        | -                 | -        | -        | 69.72    |
| <i>Bradyidius armatus</i>     | -                 | -        | -        | -        | -         | -        | -        | -       | -                | -        | -        | 23.53    | -                 | -        | -        | 15.69    |
| <i>Calanoidea</i>             | 9331.67           | 22741.30 | 46641.25 | 21421.57 | 94532.42  | 19610.30 | 33398.02 | 9676.17 | 36063.45         | 4204.74  | 6384.17  | -        | 20532.07          | 46898.32 | 11464.43 | 14572.18 |
| <i>Calanoidea</i>             | -                 | -        | -        | -        | -         | 329.41   | 196.08   | 23.53   | 274.51           | 172.55   | 12534.92 | 15376.65 | 156.86            | -        | 674.51   | 62.75    |
| <i>Calanus helgolandicus</i>  | -                 | -        | 31.37    | -        | 164.71    | 525.49   | 3349.02  | -       | 603.92           | 23.53    | 800.00   | 1113.73  | 196.08            | 125.49   | 15.69    | 266.67   |
| <i>Calanus sp.</i>            | -                 | -        | -        | -        | -         | -        | -        | -       | -                | -        | -        | -        | -                 | -        | -        | 23.53    |
| <i>Calocalanus pavo</i>       | -                 | -        | -        | -        | -         | -        | 7.84     | -       | -                | -        | -        | -        | 15.69             | -        | -        | -        |
| <i>Calocalanus sp.</i>        | -                 | -        | -        | -        | -         | -        | -        | -       | -                | -        | -        | -        | -                 | -        | 23.53    | -        |
| <i>Candacia armata</i>        | -                 | -        | -        | -        | -         | -        | 31.37    | 47.06   | -                | -        | -        | -        | -                 | 15.69    | 94.12    | 7.84     |
| <i>Candacia bispinosa</i>     | -                 | -        | -        | -        | -         | -        | -        | -       | -                | -        | -        | -        | 15.69             | -        | -        | -        |
| <i>Candacia longimana</i>     | -                 | -        | -        | -        | -         | 7.84     | -        | -       | -                | -        | -        | -        | -                 | -        | -        | -        |
| <i>Candacia simplex</i>       | -                 | -        | -        | -        | -         | -        | -        | -       | -                | -        | -        | -        | 7.84              | -        | -        | -        |
| <i>Centropages kroyeri</i>    | -                 | -        | -        | -        | -         | -        | -        | 7.84    | -                | -        | -        | -        | -                 | 7.84     | -        | -        |



|                                  |        |        |        |   |        |       |        |       |        |        |        |        |        |        |        |        |
|----------------------------------|--------|--------|--------|---|--------|-------|--------|-------|--------|--------|--------|--------|--------|--------|--------|--------|
| <i>Monstrilla sp.</i>            | -      | -      | -      | - | -      | -     | -      | -     | -      | -      | -      | -      | -      | -      | 7.84   | -      |
| Class MALACOSTRACA               |        |        |        |   |        |       |        |       |        |        |        |        |        |        |        |        |
| Order AMPHIPODA                  |        |        |        |   |        |       |        |       |        |        |        |        |        |        |        |        |
| <i>Eupronoe minuta</i>           | -      | -      | -      | - | -      | -     | -      | -     | -      | -      | 7.84   | -      | -      | -      | -      | -      |
| <i>Hyperia sp.</i>               | -      | -      | -      | - | -      | -     | -      | -     | -      | -      | -      | -      | 39.22  | -      | -      | -      |
| <i>Lestrigonus schizogeneios</i> | -      | -      | -      | - | -      | -     | -      | -     | 39.22  | -      | 156.86 | 86.27  | 15.69  | -      | 7.84   | 62.75  |
| <i>Lycaea pulex</i>              | -      | -      | -      | - | -      | -     | -      | -     | -      | -      | -      | -      | 7.84   | -      | -      | -      |
| <i>Phronima atlantica</i>        | -      | -      | -      | - | -      | -     | -      | -     | 7.84   | -      | 7.84   | -      | -      | -      | 7.84   | -      |
| <i>Phronima sedentaria</i>       | -      | -      | -      | - | -      | -     | -      | -     | -      | -      | -      | -      | 7.84   | -      | -      | -      |
| <i>Phrosina semilunata</i>       | -      | -      | -      | - | -      | -     | -      | -     | -      | -      | 7.84   | -      | -      | -      | -      | -      |
| <i>Phtisica marina</i>           | -      | -      | -      | - | -      | -     | -      | 7.84  | -      | -      | -      | -      | -      | -      | -      | -      |
| <i>Primno macropa</i>            | -      | -      | -      | - | -      | -     | -      | -     | -      | -      | -      | -      | 7.84   | -      | -      | -      |
| <i>Pseudolirius kroyeri</i>      | -      | -      | -      | - | -      | -     | 15.69  | -     | -      | 15.69  | -      | -      | -      | -      | -      | -      |
| <i>Themisto abyssorum</i>        | -      | -      | -      | - | -      | -     | -      | -     | -      | -      | -      | 7.84   | -      | -      | -      | -      |
| Order DECAPODA (zoea)            |        |        |        |   |        |       |        |       |        |        |        |        |        |        |        |        |
| Alpheidae                        | -      | -      | -      | - | -      | 7.84  | -      | -     | -      | -      | -      | 7.84   | -      | -      | -      | -      |
| Axiidea                          | -      | -      | -      | - | -      | -     | 454.90 | -     | 109.80 | -      | -      | -      | -      | -      | 47.06  | -      |
| Brachyura                        | 219.61 | 7.84   | -      | - | 101.96 | 15.69 | 125.49 | 62.75 | 39.22  | 340.09 | 23.53  | 133.33 | 128.49 | 188.24 | 7.84   | 721.63 |
| Caridea                          | -      | -      | -      | - | -      | -     | -      | -     | -      | -      | -      | -      | -      | 180.39 | -      | -      |
| Crangonidae                      | -      | -      | -      | - | -      | 62.75 | -      | 23.53 | 47.06  | -      | 7.84   | 7.84   | -      | 15.69  | -      | 15.69  |
| <i>Diogenes pugilator</i>        | 7.84   | -      | -      | - | -      | -     | -      | -     | -      | -      | -      | -      | -      | -      | -      | -      |
| Galatheidae                      | -      | -      | -      | - | -      | -     | -      | -     | 31.37  | -      | -      | -      | -      | -      | -      | -      |
| Hippolytidae                     | 47.06  | 117.65 | 54.90  | - | 31.37  | -     | -      | -     | -      | -      | 7.84   | -      | -      | -      | -      | -      |
| <i>Jaxea nocturna</i>            | -      | -      | -      | - | -      | -     | -      | 7.84  | -      | -      | -      | -      | -      | 7.84   | -      | -      |
| Paguroidea                       | 78.43  | -      | -      | - | 7.84   | 23.53 | -      | -     | -      | -      | -      | -      | 15.69  | 31.37  | 180.39 | -      |
| Palaemonidae                     | -      | -      | 23.53  | - | 7.84   | -     | -      | 31.37 | 7.84   | -      | 541.18 | 7.84   | 7.84   | 23.53  | -      | -      |
| Pandalidae                       | -      | -      | -      | - | 7.84   | -     | -      | 62.75 | -      | -      | -      | 31.37  | 15.69  | -      | 15.69  | -      |
| Penaeidae                        | -      | -      | -      | - | -      | 7.84  | 31.37  | -     | -      | 7.84   | -      | 101.96 | -      | 188.24 | -      | -      |
| Porcellanidae                    | 62.75  | 7.84   | -      | - | -      | -     | -      | -     | -      | -      | -      | -      | -      | -      | -      | -      |
| Processidae                      | 149.02 | 31.37  | -      | - | 70.59  | 7.84  | 149.02 | -     | 7.84   | -      | -      | 15.69  | 15.69  | -      | -      | -      |
| Stenopodidea                     | -      | -      | 109.80 | - | 7.84   | 47.06 | -      | -     | -      | -      | -      | -      | -      | -      | -      | -      |
| <i>Upogebia sp.</i>              | -      | -      | -      | - | -      | -     | -      | -     | -      | 180.39 | -      | -      | -      | -      | -      | -      |
| Order DECAPODA (megalopa)        |        |        |        |   |        |       |        |       |        |        |        |        |        |        |        |        |
| Brachyura                        | -      | -      | -      | - | -      | -     | -      | -     | 7.84   | 7.84   | -      | 7.84   | -      | 7.84   | -      | -      |



|                                |       |       |       |   |        |        |        |       |         |       |        |         |         |         |         |         |
|--------------------------------|-------|-------|-------|---|--------|--------|--------|-------|---------|-------|--------|---------|---------|---------|---------|---------|
| <i>Phylum</i><br>CHAETOGNATHA  | -     | -     | -     | - | 172.55 | 133.33 | 705.88 | -     | 980.39  | 7.84  | 149.02 | 933.33  | 2394.44 | 1450.98 | 1082.35 | 1050.12 |
| <i>Phylum</i> CHORDATA         |       |       |       |   |        |        |        |       |         |       |        |         |         |         |         |         |
| <i>Subphylum</i> TUNICATA      |       |       |       |   |        |        |        |       |         |       |        |         |         |         |         |         |
| <i>Class</i><br>APPENDICULARIA | -     | -     | -     | - | -      | -      | 963.40 | -     | 1352.38 | -     | -      | 2427.71 | 39.22   | 3110.70 | -       | 178.66  |
| <i>Class</i> THALIACEA         | -     | -     | -     | - | -      | 23.53  | 39.22  | -     | 748.83  | -     | 203.92 | 778.19  | -       | 282.35  | 86.27   | 588.24  |
| <i>Subphylum</i><br>VERTEBRATA |       |       |       |   |        |        |        |       |         |       |        |         |         |         |         |         |
| Anchovy eggs                   | 39.22 | -     | 23.53 | - | 211.76 | 347.09 | 235.29 | -     | -       | 23.53 | 70.59  | 693.63  | -       | -       | 15.69   | -       |
| Fish eggs                      | 54.90 | 23.53 | 39.22 | - | -      | 173.54 | 270.37 | 15.69 | 149.02  | 31.37 | -      | -       | -       | -       | 47.06   | 7.84    |
| Fish larvae                    | 7.84  | -     | -     | - | -      | 54.90  | -      | -     | 164.71  | 39.22 | 15.69  | 31.37   | 15.69   | 47.06   | -       | 54.90   |

**Table S2.** PERMANOVA results of univariate analyses carried out on zooplankton abundance, biomass and diversity (in terms of  $H'$  index). In vs. off=inshore vs. offshore

| Source               | df | Abundance |                    | Biomass |                    | Diversity ( $H'$ ) |                    |
|----------------------|----|-----------|--------------------|---------|--------------------|--------------------|--------------------|
|                      |    | MS        | Pseudo-F           | MS      | Pseudo-F           | MS                 | Pseudo-F           |
| sub-area             | 2  | 1.73      | 4.20*              | 0.22    | 0.46 <sup>ns</sup> | 0.79               | 1.98 <sup>ns</sup> |
| In vs. off           | 1  | 1.7       | 4.11 <sup>ns</sup> | 3.39    | 6.96*              | 0.64               | 1.60 <sup>ns</sup> |
| sub-basin*In vs. off | 2  | 0.13      | 0.31 <sup>ns</sup> | 0.26    | 0.53 <sup>ns</sup> | 0.38               | 0.96 <sup>ns</sup> |
| Residuals            | 10 | 0.41      |                    | 0.49    |                    | 0.4                |                    |
| Total                | 15 |           |                    |         |                    |                    |                    |

\*= $p < 0.05$ ; ns=not significant difference

**Table S3.** PERMANOVA results of multivariate analysis on zooplankton abundance, a) main test, b) pairwise comparisons for factor “sub-area”. NA=Northern Adriatic, CA=Central Adriatic, SA=Southern Adriatic; In vs. off=inshore vs. offshore

a)

| Source               | df | MS     | Pseudo-F |
|----------------------|----|--------|----------|
| sub-area             | 2  | 3053.6 | 4.07**   |
| Inshore vs. offshore | 1  | 1854.5 | 2.47*    |
| sub-area*In vs. off  | 2  | 1350.8 | 1.80*    |
| Residuals            | 9  | 750.44 |          |
| Total                | 14 |        |          |

b)

| Groups    | t                  |
|-----------|--------------------|
| NA vs. CA | 1.92**             |
| NA vs. SA | 2.72**             |
| CA vs. SA | 1.30 <sup>ns</sup> |

\*=p<0.05; \*\*=p<0.01; ns=not significant difference



**Table S4.** Results of SIMPER analysis examining a) dissimilarity between contiguous pair of sub-area groups across all Inshore vs. offshore groups, and b) dissimilarity between Inshore vs. offshore groups within each sub-area, with a 50% cut-off for low contribution. NA = Northern Adriatic; CA = Central Adriatic; SA =Southern Adriatic.

a)

| <b>NA vs. CA</b>                 |                 | <b>Average dissimilarity = 54.73</b> |                |                 |              |
|----------------------------------|-----------------|--------------------------------------|----------------|-----------------|--------------|
| <b>Species</b>                   | <b>NA</b>       | <b>CA</b>                            | <b>Av.Diss</b> | <b>Contrib%</b> | <b>Cum.%</b> |
|                                  | <b>Av.Abund</b> | <b>Av.Abund</b>                      |                |                 |              |
| <i>Calanus-like</i>              | 1.58            | 6.61                                 | 1.96           | 3.59            | 3.59         |
| <i>Euchaeta sp.</i>              | 1.39            | 6.01                                 | 1.83           | 3.34            | 6.93         |
| <i>Acartia sp.</i>               | 9.01            | 7.11                                 | 1.55           | 2.84            | 9.77         |
| <i>Euterpina acutifrons</i>      | 5.2             | 0.75                                 | 1.54           | 2.81            | 12.58        |
| <i>Evadne spinifera</i>          | 5.2             | 2.26                                 | 1.47           | 2.69            | 15.27        |
| <i>Penilia avirostris</i>        | 4.9             | 4.19                                 | 1.39           | 2.54            | 17.81        |
| <i>Oncaea sp.</i>                | 4.93            | 7.17                                 | 1.3            | 2.37            | 20.18        |
| <i>Calanus helgolandicus</i>     | 3.28            | 4.66                                 | 1.28           | 2.34            | 22.52        |
| Chaetognatha                     | 2.37            | 4.18                                 | 1.22           | 2.23            | 24.74        |
| Gasteropoda larvae               | 5.19            | 4.97                                 | 1.21           | 2.2             | 26.95        |
| Thaliacea                        | 0.98            | 3.72                                 | 1.2            | 2.19            | 29.13        |
| <i>Meganyctiphanes norvegica</i> | 0               | 3.44                                 | 1.13           | 2.07            | 31.21        |
| <i>Centropages typicus</i>       | 6.31            | 4.74                                 | 1.11           | 2.03            | 33.24        |
| <i>Corycaeus sp.</i>             | 1.15            | 2.72                                 | 1.05           | 1.91            | 35.15        |
| Ostracoda                        | 0.65            | 3.18                                 | 1.03           | 1.89            | 37.04        |
| <i>Oithona sp.</i>               | 8.64            | 9.36                                 | 1.03           | 1.89            | 38.93        |
| <i>Temora longicornis</i>        | 3.02            | 1.62                                 | 1.02           | 1.86            | 40.79        |
| Appendicularia                   | 0.98            | 3                                    | 1.02           | 1.86            | 42.65        |
| <i>Creseis acicula</i>           | 0.99            | 3.12                                 | 1.01           | 1.84            | 44.5         |
| Calanoida                        | 10.24           | 7.36                                 | 0.99           | 1.81            | 46.31        |
| Anchovy eggs                     | 3.37            | 2.8                                  | 0.97           | 1.78            | 48.09        |
| Bivalvia larvae                  | 5.72            | 7.37                                 | 0.96           | 1.76            | 49.85        |
| <i>Podon sp.</i>                 | 7.88            | 5.52                                 | 0.95           | 1.74            | 51.59        |
| <b>Groups CA vs. SA</b>          |                 | <b>Average dissimilarity = 49.79</b> |                |                 |              |
| <b>Species</b>                   | <b>CA</b>       | <b>SA</b>                            | <b>Av.Diss</b> | <b>Contrib%</b> | <b>Cum.%</b> |
|                                  | <b>Av.Abund</b> | <b>Av.Abund</b>                      |                |                 |              |
| Bivalvia larvae                  | 7.37            | 1.66                                 | 1.77           | 3.55            | 3.55         |
| Gasteropoda larvae               | 4.97            | 1.79                                 | 1.32           | 2.65            | 6.19         |
| Appendicularia                   | 3               | 4.23                                 | 1.21           | 2.43            | 8.62         |
| <i>Acartia sp.</i>               | 7.11            | 3                                    | 1.21           | 2.43            | 11.05        |
| <i>Creseis acicula</i>           | 3.12            | 4.66                                 | 1.12           | 2.24            | 13.29        |
| <i>Penilia avirostris</i>        | 4.19            | 4.8                                  | 1.09           | 2.19            | 15.48        |
| <i>Calanus-like</i>              | 6.61            | 3.93                                 | 1.06           | 2.12            | 17.61        |
| <i>Corycaeus sp.</i>             | 2.72            | 5.96                                 | 1.04           | 2.09            | 19.7         |
| <i>Temora stylifera</i>          | 1.16            | 3.56                                 | 1.02           | 2.04            | 21.74        |
| Chaetognatha                     | 4.18            | 7.25                                 | 1              | 2               | 23.74        |
| <i>Podon sp.</i>                 | 5.52            | 5.09                                 | 0.96           | 1.92            | 25.67        |
| <i>Nannocalanus minor</i>        | 1.71            | 3.91                                 | 0.94           | 1.88            | 27.55        |
| Calycophorae                     | 1.66            | 3.47                                 | 0.93           | 1.87            | 29.42        |
| Thaliacea                        | 3.72            | 4.12                                 | 0.93           | 1.86            | 31.28        |
| <i>Meganyctiphanes norvegica</i> | 3.44            | 0.54                                 | 0.88           | 1.77            | 33.06        |
| <i>Microsetella sp.</i>          | 2.31            | 2.61                                 | 0.87           | 1.74            | 34.8         |
| Paguroidea                       | 0               | 2.87                                 | 0.86           | 1.73            | 36.53        |
| Ostracoda                        | 3.18            | 2.61                                 | 0.84           | 1.69            | 38.22        |
| <i>Candacia spp</i>              | 0.77            | 3.19                                 | 0.8            | 1.61            | 39.83        |

|                                |      |      |      |      |       |
|--------------------------------|------|------|------|------|-------|
| Calanoida                      | 7.36 | 9.9  | 0.79 | 1.58 | 41.41 |
| <i>Lucicutia flavicornis</i>   | 0    | 2.62 | 0.79 | 1.58 | 42.99 |
| <i>Calanus helgolandicus</i>   | 4.66 | 4.63 | 0.78 | 1.56 | 44.55 |
| <i>Clytemmestra scutellata</i> | 2.25 | 1.99 | 0.77 | 1.55 | 46.11 |
| Anchovy eggs                   | 2.8  | 0.7  | 0.77 | 1.54 | 47.65 |
| <i>Centropages typicus</i>     | 4.74 | 4.1  | 0.72 | 1.45 | 49.1  |
| <i>Euchaeta sp.</i>            | 6.01 | 6.05 | 0.71 | 1.44 | 50.54 |

b)

| <b>Within NA</b>                 |                 | <b>Average dissimilarity = 49.59</b> |                |                 |              |
|----------------------------------|-----------------|--------------------------------------|----------------|-----------------|--------------|
|                                  | <b>inshore</b>  | <b>offshore</b>                      |                |                 |              |
| <b>Taxon</b>                     | <b>Av.Abund</b> | <b>Av.Abund</b>                      | <b>Av.Diss</b> | <b>Contrib%</b> | <b>Cum.%</b> |
| Calycophorae                     | 0               | 6.31                                 | 2.43           | 4.91            | 4.91         |
| <i>Calanus helgolandicus</i>     | 0.87            | 6.5                                  | 2.18           | 4.41            | 9.31         |
| Chaetognatha                     | 0               | 5.54                                 | 2.12           | 4.28            | 13.59        |
| <i>Oncaea sp.</i>                | 2.9             | 7.65                                 | 1.96           | 3.95            | 17.54        |
| <i>Penilia avirostris</i>        | 2.89            | 7.58                                 | 1.93           | 3.89            | 21.43        |
| <i>Acartia sp.</i>               | 8.03            | 10.31                                | 1.72           | 3.48            | 24.9         |
| <i>Oithona sp.</i>               | 7.1             | 10.69                                | 1.72           | 3.47            | 28.38        |
| <i>Evadne spinifera</i>          | 4.83            | 5.7                                  | 1.65           | 3.33            | 31.71        |
| <i>Temora longicornis</i>        | 1.95            | 4.46                                 | 1.56           | 3.15            | 34.86        |
| Anchovy eggs                     | 1.72            | 5.56                                 | 1.56           | 3.15            | 38.02        |
| Gasteropoda larvae               | 5.7             | 4.52                                 | 1.42           | 2.86            | 40.88        |
| Calanus-like                     | 0               | 3.69                                 | 1.34           | 2.7             | 43.58        |
| <i>Pseudevadne tergestina</i>    | 0               | 2.99                                 | 1.3            | 2.63            | 46.21        |
| Bivalvia larvae                  | 4.54            | 7.3                                  | 1.26           | 2.55            | 48.75        |
| <i>Temora stylifera</i>          | 0               | 3.51                                 | 1.25           | 2.51            | 51.27        |
| <b>Within CA</b>                 |                 | <b>Average dissimilarity = 53.73</b> |                |                 |              |
|                                  | <b>inshore</b>  | <b>offshore</b>                      |                |                 |              |
| <b>Taxon</b>                     | <b>Av.Abund</b> | <b>Av.Abund</b>                      | <b>Av.Diss</b> | <b>Contrib%</b> | <b>Cum.%</b> |
| <i>Penilia avirostris</i>        | 7.9             | 0                                    | 2.54           | 4.72            | 4.72         |
| Thaliacea                        | 0               | 5.97                                 | 1.89           | 3.53            | 8.25         |
| Ostracoda                        | 0               | 5.37                                 | 1.7            | 3.17            | 11.41        |
| <i>Calanus helgolandicus</i>     | 1.6             | 6.55                                 | 1.63           | 3.04            | 14.45        |
| <i>Eucaheta sp.</i>              | 3.17            | 8.04                                 | 1.59           | 2.95            | 17.4         |
| Chaetognatha                     | 1.09            | 5.95                                 | 1.57           | 2.92            | 20.32        |
| <i>Corycaeus sp.</i>             | 1.09            | 5.71                                 | 1.5            | 2.8             | 23.12        |
| <i>Podon sp.</i>                 | 7.54            | 3.68                                 | 1.45           | 2.7             | 25.82        |
| <i>Lestrigonus schizogeneios</i> | 0               | 4.38                                 | 1.41           | 2.63            | 28.44        |
| <i>Creseis acicula</i>           | 1.6             | 4.06                                 | 1.24           | 2.31            | 30.76        |
| Calanus-like                     | 4.18            | 7.53                                 | 1.14           | 2.12            | 32.87        |
| Gasteropoda larvae               | 5.83            | 3.21                                 | 1.12           | 2.09            | 34.96        |
| <i>Gaetanus tenuispinus</i>      | 3.8             | 0                                    | 1.09           | 2.03            | 36.99        |
| Appendicularia                   | 0               | 3.61                                 | 1.08           | 2.02            | 39           |
| <i>Evadne spinifera</i>          | 3.34            | 2.31                                 | 1.04           | 1.94            | 40.94        |
| Palaemonidae                     | 1.74            | 4.24                                 | 0.99           | 1.85            | 42.79        |
| <i>Isias clavipes</i>            | 2.94            | 0                                    | 0.91           | 1.7             | 44.49        |
| <i>Microsetella sp.</i>          | 0               | 2.66                                 | 0.9            | 1.67            | 46.17        |
| Fish larvae                      | 1.85            | 3.96                                 | 0.85           | 1.57            | 47.74        |
| <i>Temora stylifera</i>          | 2.91            | 0                                    | 0.84           | 1.55            | 49.3         |
| <i>Copilia mediterranea</i>      | 0               | 2.76                                 | 0.83           | 1.54            | 50.84        |
| <b>Within SA</b>                 |                 | <b>Average dissimilarity = 45.48</b> |                |                 |              |

| Taxon                            | inshore  | offshore | Av.Diss | Contrib% | Cum.% |
|----------------------------------|----------|----------|---------|----------|-------|
|                                  | Av.Abund | Av.Abund |         |          |       |
| Calanoida                        | 9.9      | 4.96     | 1.41    | 3.1      | 3.1   |
| <i>Meganyctiphanes norvegica</i> | 0        | 4.45     | 1.22    | 2.69     | 5.79  |
| Calanus-like                     | 3.56     | 7.35     | 1.2     | 2.65     | 8.43  |
| Bivalvia larvae                  | 2.22     | 4.23     | 1.16    | 2.55     | 10.98 |
| <i>Acartia sp.</i>               | 4        | 3.9      | 1.1     | 2.43     | 13.41 |
| Ostracoda                        | 1.63     | 5.35     | 1.06    | 2.33     | 15.74 |
| Thaliacea                        | 5.5      | 3.33     | 0.98    | 2.15     | 17.89 |
| Gasteropoda larvae               | 2.38     | 3.38     | 0.97    | 2.13     | 20.02 |
| Calycephorae                     | 2.91     | 5.66     | 0.96    | 2.11     | 22.13 |
| <i>Corycaeus sp.</i>             | 5.64     | 3.46     | 0.94    | 2.07     | 24.2  |
| Appendicularia                   | 4.41     | 5.74     | 0.94    | 2.06     | 26.27 |
| <i>Temora stylifera</i>          | 3.81     | 1.41     | 0.92    | 2.02     | 28.29 |
| <i>Microsetella sp.</i>          | 3.49     | 3.13     | 0.89    | 1.95     | 30.24 |
| Anchovy eggs                     | 0.94     | 3.27     | 0.89    | 1.95     | 32.19 |
| <i>Podon sp.</i>                 | 4.92     | 5.38     | 0.88    | 1.93     | 34.12 |
| <i>Creseis acicula</i>           | 4.6      | 4.56     | 0.88    | 1.93     | 36.05 |
| <i>Centropages typicus</i>       | 4.24     | 3.45     | 0.87    | 1.92     | 37.97 |
| <i>Lucicutia flavicornis</i>     | 1.54     | 2.93     | 0.85    | 1.87     | 39.84 |
| <i>Clytemnestra scutellata</i>   | 2.65     | 2.93     | 0.82    | 1.8      | 41.65 |
| Processidae                      | 0        | 2.81     | 0.8     | 1.75     | 43.4  |
| <i>Penilia avirostris</i>        | 4.37     | 5.63     | 0.72    | 1.59     | 44.99 |
| Aetideidae                       | 2.49     | 0        | 0.71    | 1.57     | 46.56 |
| <i>Copilia mediterranea</i>      | 0        | 2.5      | 0.71    | 1.56     | 48.12 |
| Penaeidae                        | 1.75     | 2.32     | 0.71    | 1.55     | 49.67 |
| <i>Mecynocera clausi</i>         | 0        | 2.58     | 0.69    | 1.51     | 51.19 |

**Table S5.** Mean values and standard deviations (SD) of temperature (° C), salinity, fluorescence (µg/l) and dissolved oxygen (ml/l), for each sub-area and at inshore vs. offshore stations. NA = Northern Adriatic; CA = Central Adriatic; SA =Southern Adriatic; In vs. off=inshore vs. offshore.

| sub-area | in vs. off | Temperature | SD   | Salinity | SD   | Fluorescence | SD   | Oxygen | SD   |
|----------|------------|-------------|------|----------|------|--------------|------|--------|------|
| NA       | in         | 17.93       | 1.23 | 35.66    | 0.78 | 3.22         | 1.29 | 5.37   | 0.15 |
| NA       | off        | 17.13       | 1.54 | 37.41    | 0.56 | 1.68         | 0.43 | 5.28   | 0.05 |
| CA       | in         | 20.63       | 1.73 | 37.83    | 0.65 | 1.19         | 0.51 | 4.62   | 0.31 |
| CA       | off        | 16.71       | 0.36 | 38.97    | 0.01 | 0.70         | 0.12 | 4.79   | 0.05 |
| SA       | in         | 21.63       | 0.08 | 38.20    | 0.16 | 0.92         | 0.27 | 4.45   | 0.08 |
| SA       | off        | 16.71       | 0.36 | 38.97    | 0.01 | 0.70         | 0.12 | 4.79   | 0.05 |

**Table S6.** Results of univariate PERMANOVA a) main test and b) pairwise comparisons for the factor 'sub-area' and interaction term 'sub-area x in. vs. off' for pairs of levels of factor "inshore vs. offshore" run on the Euclidean resemblance matrix of untransformed temperature, salinity, fluorescence, oxygen. NA = Northern Adriatic; CA = Central Adriatic; SA =Southern Adriatic; In vs. off=inshore vs. offshore.

| <b>a) main test</b> |           |                    |                 |                |                 |                 |                |                     |                 |                |               |                 |                |
|---------------------|-----------|--------------------|-----------------|----------------|-----------------|-----------------|----------------|---------------------|-----------------|----------------|---------------|-----------------|----------------|
| <b>Source</b>       | <b>df</b> | <b>temperature</b> |                 |                | <b>salinity</b> |                 |                | <b>fluorescence</b> |                 |                | <b>oxygen</b> |                 |                |
|                     |           | <b>MS</b>          | <b>Pseudo-F</b> | <b>P(perm)</b> | <b>MS</b>       | <b>Pseudo-F</b> | <b>P(perm)</b> | <b>MS</b>           | <b>Pseudo-F</b> | <b>P(perm)</b> | <b>MS</b>     | <b>Pseudo-F</b> | <b>P(perm)</b> |
| sub-area            | 2         | 4.85               | 3.94            | 0.047          | 9.25            | 38.33           | 0.0001         | 5.94                | 14.35           | 0.0006         | 1.04          | 53.12           | 0.0001         |
| in vs. off          | 1         | 50.78              | 41.28           | 0.0001         | 7.33            | 30.38           | 0.0001         | 2.78                | 6.7             | 0.02           | 0.1           | 5.23            | 0.03           |
| sub-area*in vs. off | 2         | 7.99               | 6.50            | 0.01           | 0.41            | 1.68            | 0.21           | 0.85                | 2.06            | 0.16           | 0.08          | 3.99            | 0.04           |
| Res                 | 15        | 1.23               |                 |                | 0.24            |                 |                | 0.41                |                 |                | 0.02          |                 |                |
| Total               | 20        |                    |                 |                |                 |                 |                |                     |                 |                |               |                 |                |

  

| <b>b) pairwise comparisons</b>                |          |                |                 |          |                |                     |          |                |               |          |                |  |
|-----------------------------------------------|----------|----------------|-----------------|----------|----------------|---------------------|----------|----------------|---------------|----------|----------------|--|
| <b>Within level 'NA' of factor 'sub-area'</b> |          |                |                 |          |                |                     |          |                |               |          |                |  |
| <b>temperature</b>                            |          |                | <b>salinity</b> |          |                | <b>fluorescence</b> |          |                | <b>oxygen</b> |          |                |  |
| <b>Groups</b>                                 | <b>t</b> | <b>P(perm)</b> | <b>Groups</b>   | <b>t</b> | <b>P(perm)</b> | <b>Groups</b>       | <b>t</b> | <b>P(perm)</b> | <b>Groups</b> | <b>t</b> | <b>P(perm)</b> |  |
| in vs. off                                    | 0.82     | 0.44           | in vs. off      | 3.65     | 0.012          | in vs. off          | 2.27     | 0.05           | in vs. off    | 1.05     | 0.33           |  |
| <b>Within level 'CA' of factor 'sub-area'</b> |          |                |                 |          |                |                     |          |                |               |          |                |  |
| in vs. off                                    | 4.54     | 0.007          | in vs. off      | 3.65     | 0.015          | in vs. off          | 1.91     | 0.06           | in vs. off    | 1.11     | 0.32           |  |
| <b>Within level 'SA' of factor 'sub-area'</b> |          |                |                 |          |                |                     |          |                |               |          |                |  |
| in vs. off                                    | 18.287   | 0.0002         | in vs. off      | 10.99    | 0.0005         | in vs. off          | 1.48     | 0.21           | in vs. off    | 6.65     | 0.003          |  |
| <b>term "sub-area"</b>                        |          |                |                 |          |                |                     |          |                |               |          |                |  |
| <b>temperature</b>                            |          |                | <b>salinity</b> |          |                | <b>fluorescence</b> |          |                | <b>oxygen</b> |          |                |  |
| NA vs. CA                                     | 1.71     | 0.11           | NA vs. CA       | 6.29     | 0.0001         | NA vs. CA           | 3.88     | 0.003          | NA vs. CA     | 7.4      | 0.0002         |  |
| CA vs. SA                                     | 1.00     | 0.34           | CA vs. SA       | 1.03     | 0.32           | CA vs. SA           | 0.86     | 0.41           | CA vs. SA     | 0.98     | 0.35           |  |

**Table S7.** Results of PERMANOVA a) main test and b) pairwise comparisons for sub-area factor and the interaction term for pairs of levels of factor “inshore vs. offshore” run on the Euclidean resemblance matrix of untransformed  $\delta^{15}\text{N}$  and  $\delta^{13}\text{C}$  values and for  $\delta^{15}\text{N}$  and  $\delta^{13}\text{C}$ , separately. NA = Northern Adriatic; CA = Central Adriatic; SA =Southern Adriatic; In vs. off=inshore vs. offshore.

a)

| Source               | df  | $\delta^{13}\text{C}-\delta^{15}\text{N}$ |                    | $\delta^{15}\text{N}$ |                    | $\delta^{13}\text{C}$ |                    |
|----------------------|-----|-------------------------------------------|--------------------|-----------------------|--------------------|-----------------------|--------------------|
|                      |     | MS                                        | Pseudo-F           | MS                    | Pseudo-F           | MS                    | Pseudo-F           |
| sub-area             | 2   | 8.26                                      | 3.01*              | 6.26                  | 3.66*              | 2.00                  | 1.93 <sup>ns</sup> |
| Inshore vs. offshore | 1   | 28.32                                     | 10.32***           | 14.62                 | 8.55**             | 13.71                 | 13.23**            |
| sub-area*In vs. off  | 2   | 3.81                                      | 1.39 <sup>ns</sup> | 0.49                  | 0.29 <sup>ns</sup> | 3.32                  | 3.21*              |
| Residuals            | 120 | 2.75                                      |                    | 1.71                  |                    | 1.04                  |                    |
| Total                | 125 |                                           |                    |                       |                    |                       |                    |

b)

| Groups                                 | $\delta^{13}\text{C}-\delta^{15}\text{N}$ | $\delta^{15}\text{N}$ | $\delta^{13}\text{C}$ |
|----------------------------------------|-------------------------------------------|-----------------------|-----------------------|
|                                        | t                                         | t                     | t                     |
| on factor "sub-area"                   |                                           |                       |                       |
| NA vs. CA                              | 1.57 <sup>ns</sup>                        | 1.85 <sup>ns</sup>    | 1.18 <sup>ns</sup>    |
| CA vs. SA                              | 1.49 <sup>ns</sup>                        | 0.63 <sup>ns</sup>    | 2.56*                 |
| Within level 'NA' of factor 'sub-area' |                                           |                       |                       |
| In vs. off                             | 1.66 <sup>ns</sup>                        | 1.89 <sup>ns</sup>    | 1.37 <sup>ns</sup>    |
| Within level 'CA' of factor 'sub-area' |                                           |                       |                       |
| In vs. off                             | 3.17***                                   | 2.06*                 | 4.16***               |
| Within level 'SA' of factor 'sub-area' |                                           |                       |                       |
| In vs. off                             | 1.02 <sup>ns</sup>                        | 1.08 <sup>ns</sup>    | 0.52 <sup>ns</sup>    |

\*= $p < 0.05$ ; \*\*= $p < 0.01$ ; \*\*\*= $p < 0.001$ ; ns=not significant difference

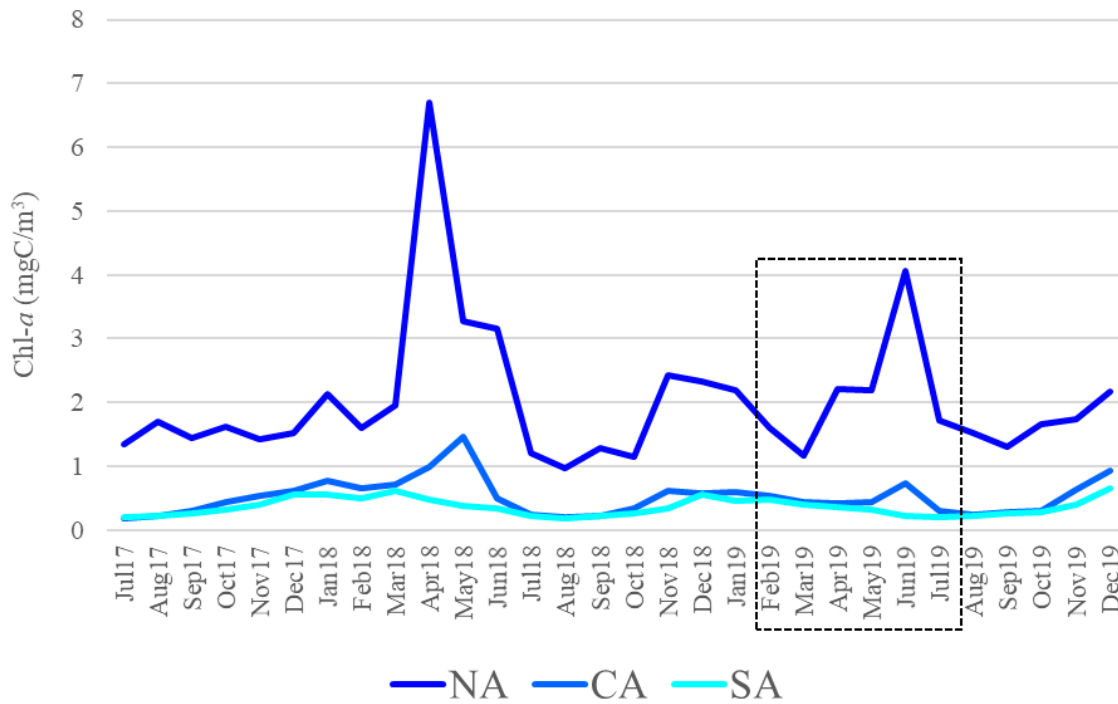

**Figure S1.** Monthly time-series area-averaged map of satellite-derived (Sensor MODIS Aqua from <https://giovanni.gsfc.nasa.gov/giovanni>) Chlorophyll-*a* concentration (mgC/m<sup>3</sup>) from July 2017 to December 2019 for the three sub-areas considered in this study. The dashed rectangle encompassed values of Chl-*a* before (from 4 months) and during the survey (June-July 2019).
